# Supplementary material for: Geochemical Modeling of Heavy Metal Removal from Acid Mine Drainage in an Ethanol-Supplemented Sulfate-Reducing Column Test
Source: MDPI journal article supplement (doi:10.3390/ma16030928), 2023-01-18
Supplement: s1 [file s1]

# **Geochemical Modeling of Heavy Metal Removal from Acid Mine Drainage in an Ethanol-Supplemented Sulfate-Reducing Column Test**

**Keishi Oyama <sup>1</sup>, Kentaro Hayashi <sup>2</sup>, Yusei Masaki <sup>2</sup>, Takaya Hamai <sup>2</sup>, Shigeshi Fuchida <sup>1,3</sup>, Yutaro Takaya <sup>1,4</sup> and Chiharu Tokoro <sup>1,4,\*</sup>**

<sup>1</sup> Faculty of Science and Engineering, Waseda University, 3-4-1 Okubo, Shinjuku-ku, Tokyo 169-8555, Japan

<sup>2</sup> Japan Organization for Metals and Energy Security (JOGMEC), 2-10-1 Toranomon, Minato-ku, Tokyo 105-0001, Japan

<sup>3</sup> Department of Marine Resources and Energy, Tokyo University of Marine Science and Technology, 4-5-7 Konan, Minato-ku, Tokyo 108-8477, Japan

<sup>4</sup> Faculty of Engineering, The University of Tokyo, 7-3-1 Hongo, Bunkyo-ku, Tokyo 113-8656, Japan

\* Correspondence: tokoro@waseda.jp; Tel.: +81-3-5286-3320

## 1. Supplemental Data

### 1.1 Parameters Used for Geochemical Modeling

**Table S1.** Elements and Ionic species considered in the geochemical modeling.

| Element | Ionic species                                                                                                                                                                                                                                                                                                                                                                                                                                                                                                                                                                                                                                                                                                                                        |
|---------|------------------------------------------------------------------------------------------------------------------------------------------------------------------------------------------------------------------------------------------------------------------------------------------------------------------------------------------------------------------------------------------------------------------------------------------------------------------------------------------------------------------------------------------------------------------------------------------------------------------------------------------------------------------------------------------------------------------------------------------------------|
| Al      | $\text{Al}(\text{OH})_4^-$ , $\text{Al}(\text{OH})_3$ , $\text{Al}(\text{OH})_2^+$ , $\text{AlOH}^{2+}$ , $\text{AlSO}_4^+$ , $\text{Al}^{3+}$ , $\text{As}(\text{SO}_4)_2^-$                                                                                                                                                                                                                                                                                                                                                                                                                                                                                                                                                                        |
| C       | $\text{HCO}_3^-$ , $\text{H}_2\text{CO}_3$ , $\text{CO}_3^{2-}$ , $\text{CH}_3\text{COO}^-$ , $\text{C}_2\text{H}_5\text{OH}$                                                                                                                                                                                                                                                                                                                                                                                                                                                                                                                                                                                                                        |
| Ca      | $\text{Ca}^{2+}$ , $\text{CaSO}_4$ , $\text{CaHCO}_3^+$ , $\text{Ca}(\text{CH}_3\text{COO})^+$ , $\text{CaCO}_3$ , $\text{CaHPO}_4$ , $\text{CaOH}^+$ , $\text{CaPO}_4^-$ ,<br>$\text{CaNH}_3^{2+}$ , $\text{CaH}_2\text{PO}_4^+$ , $\text{Ca}(\text{NH}_3)_2^{2+}$ , $\text{CaNO}_3^+$                                                                                                                                                                                                                                                                                                                                                                                                                                                              |
| Cd      | $\text{Cd}^{2+}$ , $\text{CdSO}_4$ , $\text{CdCO}_3$ , $\text{Cd}(\text{SO}_4)_2^{2-}$ , $\text{CdOH}^+$ , $\text{CdHCO}_3^+$ , $\text{Cd}(\text{CO}_3)_2^{2-}$ , $\text{Cd}(\text{OH})_2$ ,<br>$\text{Cd}_2\text{OH}^{3+}$ , $\text{Cd}(\text{OH})_3^-$ , $\text{Cd}(\text{OH})_4^{2-}$ , $\text{CdNO}_3^+$ , $\text{Cd}(\text{NO}_3)_2$ , $\text{Cd}(\text{CH}_3\text{COO})^+$ ,<br>$\text{Cd}(\text{CH}_3\text{COO})_2$ , $\text{Cd}(\text{HS})_2$ , $\text{CdHS}^+$ , $\text{Cd}(\text{HS})_3^-$ , $\text{Cd}(\text{HS})_4^{2-}$                                                                                                                                                                                                                 |
| Cu      | $\text{CuCO}_3$ , $\text{Cu}^{2+}$ , $\text{Cu}(\text{OH})_2$ , $\text{CuSO}_4$ , $\text{Cu}_2(\text{OH})_2^{2+}$ , $\text{Cu}(\text{CO}_3)_2^{2-}$ , $\text{CuHCO}_3^+$ , $\text{CuNH}_3^{2+}$ ,<br>$\text{Cu}(\text{OH})_3^-$ , $\text{Cu}(\text{OH})_4^{2-}$ , $\text{CuNO}_2^+$ , $\text{CuNO}_3^+$ , $\text{Cu}(\text{NO}_2)_2$ , $\text{Cu}(\text{NO}_3)_2$ , $\text{Cu}(\text{HS})_3^-$ ,<br>$\text{Cu}(\text{CH}_3\text{COO})^+$ , $\text{Cu}(\text{CH}_3\text{COO})_2$ , $\text{Cu}(\text{CH}_3\text{COO})_3^-$                                                                                                                                                                                                                             |
| Fe      | $\text{Fe}^{2+}$ , $\text{FeSO}_4$ , $\text{FeOH}^+$ , $\text{FeHCO}_3^+$ , $\text{FeHPO}_4$ , $\text{Fe}(\text{OH})_2$ , $\text{FeH}_2\text{PO}_4^+$ , $\text{Fe}(\text{OH})_3^-$ , $\text{Fe}(\text{HS})_2$ ,<br>$\text{Fe}(\text{HS})_3^-$ , $\text{Fe}(\text{CH}_3\text{COO})^+$ , $\text{Fe}(\text{OH})_2^+$ , $\text{Fe}(\text{OH})_3$ , $\text{Fe}(\text{OH})_4^-$ , $\text{FeOH}^{2+}$ , $\text{FeHPO}_4^+$ , $\text{FeSO}_4^+$ ,<br>$\text{Fe}(\text{CH}_3\text{COO})_2^+$ , $\text{Fe}(\text{CH}_3\text{COO})_2^+$ , $\text{Fe}^{3+}$ , $\text{Fe}(\text{SO}_4)_2^-$ , $\text{Fe}(\text{CH}_3\text{COO})_3$ , $\text{FeH}_2\text{PO}_4^{2+}$ ,<br>$\text{FeNO}_3^{2+}$ , $\text{Fe}_2(\text{OH})_2^{4+}$ , $\text{Fe}_3(\text{OH})_4^{5+}$ |
| Mg      | $\text{Mg}^{2+}$ , $\text{MgSO}_4$ , $\text{MgHCO}_3^+$ , $\text{MgCO}_3$ , $\text{MgOH}^+$ , $\text{MgHPO}_4$ , $\text{MgH}_2\text{PO}_4^+$ , $\text{MgPO}_4^-$ ,<br>$\text{Mg}(\text{CH}_3\text{COO})^+$                                                                                                                                                                                                                                                                                                                                                                                                                                                                                                                                           |
| Mn      | $\text{Mn}^{2+}$ , $\text{MnSO}_4$ , $\text{MnHCO}_3^+$ , $\text{MnOH}^+$ , $\text{Mn}(\text{OH})_3^-$ , $\text{Mn}(\text{OH})_4^{2-}$ , $\text{MnNO}_3^+$ , $\text{Mn}(\text{NO}_3)_2$ ,<br>$\text{Mn}(\text{CH}_3\text{COO})^+$ , $\text{Mn}^{3+}$ , $\text{MnO}_4^{2-}$ , $\text{MnO}_4^-$                                                                                                                                                                                                                                                                                                                                                                                                                                                        |
| N       | $\text{NH}_4^+$ , $\text{NH}_3$ , $\text{NH}_4\text{SO}_4^-$ , $\text{NO}_2^-$ , $\text{NO}_3^-$ ,                                                                                                                                                                                                                                                                                                                                                                                                                                                                                                                                                                                                                                                   |
| Na      | $\text{Na}^+$ , $\text{NaSO}_4^-$ , $\text{NaHCO}_3$ , $\text{NaCO}_3^-$ , $\text{NaHPO}_4^-$ , $\text{Na}(\text{CH}_3\text{COO})$                                                                                                                                                                                                                                                                                                                                                                                                                                                                                                                                                                                                                   |
| P       | $\text{HPO}_4^{2-}$ , $\text{H}_2\text{PO}_4^-$ , $\text{PO}_4^{3-}$ , $\text{H}_3\text{PO}_4$                                                                                                                                                                                                                                                                                                                                                                                                                                                                                                                                                                                                                                                       |
| Si      | $\text{H}_4\text{SiO}_4$ , $\text{H}_3\text{SiO}_4^-$ , $\text{H}_2\text{SiO}_4^{2-}$                                                                                                                                                                                                                                                                                                                                                                                                                                                                                                                                                                                                                                                                |
| S       | $\text{H}_2\text{S}$ , $\text{HS}^-$ , $\text{S}^{2-}$ , $\text{SO}_4^{2-}$ , $\text{HSO}_4^-$                                                                                                                                                                                                                                                                                                                                                                                                                                                                                                                                                                                                                                                       |
| Zn      | $\text{Zn}^{2+}$ , $\text{ZnSO}_4$ , $\text{ZnCO}_3$ , $\text{ZnOH}^+$ , $\text{Zn}(\text{OH})_2$ , $\text{ZnHCO}_3^+$ , $\text{Zn}(\text{SO}_4)_2^{2-}$ , $\text{Zn}(\text{OH})_3^-$ ,<br>$\text{Zn}(\text{OH})_4^{2-}$ , $\text{ZnNO}_3^+$ , $\text{Zn}(\text{NO}_3)_2$ , $\text{ZnS}(\text{HS})^-$ , $\text{Zn}(\text{HS})_2$ , $\text{Zn}(\text{HS})_3^-$ , $\text{ZnS}(\text{HS})_2^{2-}$ ,<br>$\text{Zn}(\text{HS})_4^{2-}$ , $\text{Zn}(\text{CH}_3\text{COO})^+$ , $\text{Zn}(\text{CH}_3\text{COO})_2$                                                                                                                                                                                                                                      |

**Table S2.** Precipitates species considered in the geochemical modeling.

| Precipitates                                                                | Chemical Equation                                                                                                   | Log K |
|-----------------------------------------------------------------------------|---------------------------------------------------------------------------------------------------------------------|-------|
| CaCO <sub>3</sub> (Calcite)                                                 | $\text{CaCO}_3 = \text{Ca}^{2+} + \text{CO}_3^{2-}$                                                                 | -8.48 |
| CaSO <sub>4</sub> ·2H <sub>2</sub> O (Gypsum)                               | $\text{CaSO}_4 \cdot 2\text{H}_2\text{O} = \text{Ca}^{2+} + \text{SO}_4^{2-} + 2\text{H}_2\text{O}$                 | -4.61 |
| MgCO <sub>3</sub> (Magnesite)                                               | $\text{MgCO}_3 = \text{Mg}^{2+} + \text{CO}_3^{2-} + 3\text{H}_2\text{O}$                                           | -7.46 |
| Cu(OH) <sub>2</sub>                                                         | $\text{Cu(OH)}_2 + 2\text{H}^+ = \text{Cu}^{2+} + 2\text{H}_2\text{O}$                                              | 8.67  |
| CuS (Covellite)                                                             | $\text{CuS} + \text{H}^+ = \text{Cu}^{2+} + \text{HS}^-$                                                            | -22.3 |
| CuCO <sub>3</sub>                                                           | $\text{CuCO}_3 = \text{Cu}^{2+} + \text{CO}_3^{2-}$                                                                 | -11.5 |
| Cu <sub>3</sub> (OH) <sub>2</sub> (CO <sub>3</sub> ) <sub>2</sub> (Azurite) | $\text{Cu}_3(\text{OH})_2(\text{CO}_3)_2 + 2\text{H}^+ = 3\text{Cu}^{2+} + 2\text{H}_2\text{O} + 2\text{CO}_3^{2-}$ | -16.9 |
| Cu <sub>2</sub> (OH) <sub>2</sub> CO <sub>3</sub> (Malachite)               | $\text{Cu}_2(\text{OH})_2\text{CO}_3 + 2\text{H}^+ = 2\text{Cu}^{2+} + 2\text{H}_2\text{O} + \text{CO}_3^{2-}$      | -5.30 |
| Cd(OH) <sub>2</sub>                                                         | $\text{Cd}^{2+} + 2\text{H}_2\text{O} = \text{Cd(OH)}_2 + 2\text{H}^+$                                              | 13.6  |
| CdS (Greenockite)                                                           | $\text{CdS} + \text{H}^+ = \text{Cd}^{2+} + \text{HS}^-$                                                            | -14.4 |
| CdCO <sub>3</sub> (Otavite)                                                 | $\text{CdCO}_3 = \text{Cd}^{2+} + \text{CO}_3^{2-}$                                                                 | -12.0 |
| CdSiO <sub>3</sub>                                                          | $\text{CdSiO}_3 + 2\text{H}^+ + \text{H}_2\text{O} = \text{Cd}^{2+} + \text{H}_4\text{SiO}_4$                       | 9.06  |
| Zn(OH) <sub>2</sub>                                                         | $\text{Zn(OH)}_2 + 2\text{H}^+ = \text{Zn}^{2+} + 2\text{H}_2\text{O}$                                              | 12.2  |
| ZnS (Sphalerite)                                                            | $\text{ZnS} + \text{H}^+ = \text{Zn}^{2+} + \text{HS}^-$                                                            | -11.5 |
| ZnCO <sub>3</sub> (Smithsonite)                                             | $\text{ZnCO}_3 = \text{Zn}^{2+} + \text{CO}_3^{2-}$                                                                 | -10.0 |
| ZnCO <sub>3</sub> ·1H <sub>2</sub> O                                        | $\text{ZnCO}_3 \cdot 1\text{H}_2\text{O} = \text{Zn}^{2+} + \text{CO}_3^{2-} + \text{H}_2\text{O}$                  | -10.3 |

**Table S3.** Physical parameters used for the one-dimensional advection calculation.

|                        |                      |
|------------------------|----------------------|
| Number of cells [-]    | 80                   |
| Length of one cell [m] | 0.01                 |
| Total length [m]       | 0.8                  |
| HRT [sec]              | 90000                |
| Flow velocity          | $8.9 \times 10^{-6}$ |
| Flow direction         | forward              |
| Time step [sec]        | 1125                 |

### 1.2 Quantification of Silicate Dissolution from Rice Husk (Abiotic Preliminary Kinetic Test)

Silicate dissolution from rice husk was evaluated by suspending 4.5 g of rice husk in 150 mL of distilled water for 9 hours. The solution sample was routinely taken to monitor pH and then filtered to measure the concentration of silicate by ICP-OES (Agilent 5110 ICP-OES, Agilent Technologies Inc.). Based on the dissolved silicate concentration as a function of time, a kinetic equation was constructed to simulate its dissolution behavior (Fig. S1). The constructed kinetic equation (Eq. S1) was then incorporated into the geochemical model calculation as explained in chapter 2.3.

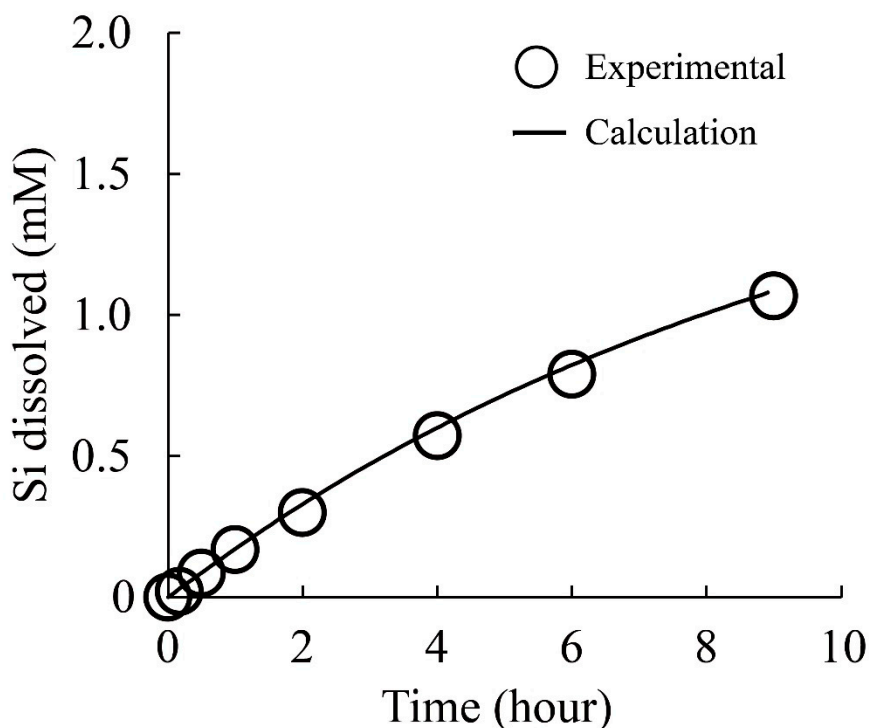

**Figure S1.** Changes in the concentration of Si dissolved from the rice husk with time (open circle). A solid line indicates the fitting curve calculated by the kinetic equation (Eq. S1).

$$d[\text{Si}]/dt = k_6(1 - 10^{\text{SI}[\text{SiO}_2]}) \quad (k_6 = 5 \times 10^{-8}) \quad (\text{S1})$$

Where  $[\text{Si}]$  indicates the concentration of Si (mg/L),  $k_6$  indicates the kinetic constant ( $\text{s}^{-1}$ ), and  $\text{SI}[\text{SiO}_2]$  indicates the saturation index of  $\text{SiO}_2$ . The kinetic constant  $k_6$  was a fitting parameter via the numerical fitting of the kinetic equation to the experimental result.
